# Supplementary material for: The immune factors driving DNA methylation variation in human blood
Source: PubMed Central journal article supplement (PMC9537159; doi:10.1038/s41467-022-33511-6), 2022-10-06
Supplement: 41467_2022_33511_MOESM3_ESM.pdf [file 41467_2022_33511_MOESM3_ESM.pdf]

## **Description of Additional Supplementary Files**

File Name: Supplementary Data 1

Description: Candidate intrinsic and environmental factors tested for association with the blood DNA methylome of adults

File Name: Supplementary Data 2

Description: Number of CpG sites associated with cell proportion contrasts and definitions of contrasts by sequential binary partition

File Name: Supplementary Data 3

Description: CpG sites significantly associated with two interacting variables

File Name: Supplementary Data 4

Description: Significant enrichments of variable-associated CpG sites in binding sites for transcription factors (TFs)

File Name: Supplementary Data 5

Description: Significant gene ontology enrichments for genes close to variable-associated CpG sites

File Name: Supplementary Data 6

Description: Summary statistics for significant remote-effect meQTLs

File Name: Supplementary Data 7

Description: Proportions of variance explained by intrinsic factors, exposures, cell composition and local SNPs for the 10,000 CpG sites with the most explained variance
